# Supplementary material
Source: MDPI journal article supplement (https://www.mdpi.com/2076-3417/10/6/2172)
Supplement: s1 [file s1]

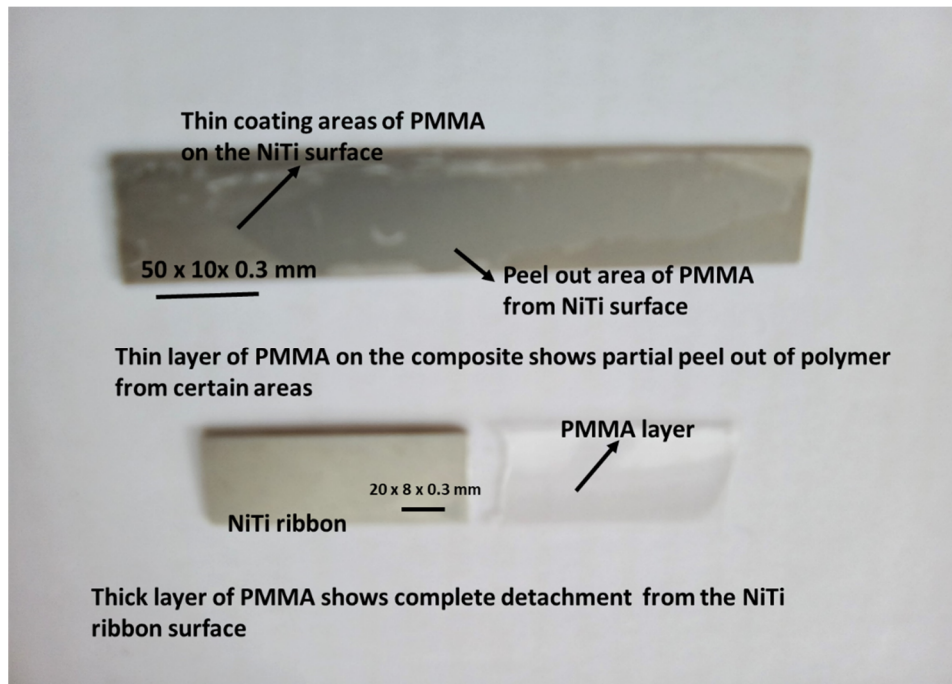

Fig. SM1 Images of the polymer PMMA on Ni-Ti surface without laser lines showing a detachment from the surface.
